# Supplementary material
Source: PubMed Central journal article supplement (PMC8769655)
Supplement: mmc2.pdf [file mmc2.pdf]

## Supplementary Tables

Table S1: Prosocial nudge effects on medical students' intent-to-dropout by pre-COVID-19 intentions

|                                                              | (1)                  | (2)                                       | (3)                    |
|--------------------------------------------------------------|----------------------|-------------------------------------------|------------------------|
| Source of heterogeneity                                      | All                  | Outcome: Post-COVID intent-to-dropout = 1 |                        |
|                                                              |                      | Pre-COVID-19 dropout=0                    | Pre-COVID-19 dropout=1 |
| <i>Parent is a doctor (yes=1)</i>                            |                      |                                           |                        |
| Treatment                                                    | -0.005***<br>(0.002) | -0.005***<br>(0.001)                      | 0.000<br>(0.008)       |
| Treatment $\times$ doctor parent                             | 0.003<br>(0.006)     | 0.003<br>(0.005)                          | -0.016<br>(0.029)      |
| <i>Teachers/Schoolmates on the frontline (yes=1)</i>         |                      |                                           |                        |
| Treatment                                                    | -0.011***<br>(0.003) | -0.010***<br>(0.002)                      | -0.013<br>(0.012)      |
| Treatment $\times$ frontline                                 | 0.011***<br>(0.003)  | 0.009***<br>(0.003)                       | 0.018<br>(0.014)       |
| <i>Paid attention to COVID-19 (yes=1)</i>                    |                      |                                           |                        |
| Treatment                                                    | -0.006***<br>(0.003) | -0.007***<br>(0.002)                      | -0.004<br>(0.010)      |
| Treatment $\times$ attention                                 | 0.003<br>(0.003)     | 0.004<br>(0.003)                          | 0.005<br>(0.013)       |
| <i>Home internet access (yes=1)</i>                          |                      |                                           |                        |
| Treatment                                                    | -0.07**<br>(0.003)   | -0.004*<br>(0.002)                        | -0.019*<br>(0.010)     |
| Treatment $\times$ internet                                  | 0.004<br>(0.003)     | -0.000<br>(0.003)                         | 0.029**<br>(0.014)     |
| <i>College province near Wuhan (yes=1)</i>                   |                      |                                           |                        |
| Treatment                                                    | -0.006***<br>(0.002) | -0.004***<br>(0.001)                      | -0.011<br>(0.009)      |
| Treatment $\times$ near Wuhan                                | 0.006*<br>(0.004)    | -0.000<br>(0.003)                         | 0.036**<br>(0.018)     |
| <i>Hometown province confirmed cases &gt; median (yes=1)</i> |                      |                                           |                        |
| Treatment                                                    | -0.007**<br>(0.003)  | -0.005*<br>(0.002)                        | -0.009<br>(0.012)      |
| Treatment $\times$ Confirmed cases                           | 0.003<br>(0.003)     | 0.000<br>(0.003)                          | 0.011<br>(0.015)       |

*Notes:* This table presents estimates on the overall and heterogeneous nudge effects on medical students' intent-to-dropout by pre-COVID-19 intentions. The overall treatment effect was obtained from Equation 4, while the heterogeneous treatment effects were obtained from Equation 5. Robust standard errors are clustered at the college-grade level. \*\*\* p<0.01, \*\* p<0.05, \* p<0.1.

Table S2: Predicting medical student dropout: Model comparison

| Model                         |                         | (1)    | (2)     | (3)    | (4)    | (5)    | (6)    | (7)           | (8)    |
|-------------------------------|-------------------------|--------|---------|--------|--------|--------|--------|---------------|--------|
|                               |                         | Linear |         | Logit  |        | LASSO  |        | Random Forest |        |
| College Fixed Effect          |                         | No     | Yes     | No     | Yes    | No     | Yes    | No            | Yes    |
| Predicted dropout probability |                         |        |         |        |        |        |        |               |        |
|                               | Min                     | 0.0158 | -0.0687 | 0.0499 | 0.0152 | 0.0501 | 0.0194 | 0.0000        | 0.0000 |
|                               | Mean                    | 0.1380 | 0.1381  | 0.1381 | 0.1381 | 0.1381 | 0.1381 | 0.1382        | 0.1367 |
|                               | Median                  | 0.1346 | 0.1329  | 0.1310 | 0.1262 | 0.1308 | 0.1267 | 0.1274        | 0.0475 |
|                               | Max                     | 0.3222 | 0.4550  | 0.3927 | 0.5801 | 0.3895 | 0.5592 | 0.9700        | 1.0000 |
| Classification accuracy       |                         |        |         |        |        |        |        |               |        |
|                               | Training (75% sample)   | 54.38% | 56.53%  | 57.43% | 60.05% | 57.43% | 57.43% | 61.42%        | 81.79% |
|                               | Validation (25% sample) | 54.02% | 55.91%  | 57.02% | 59.50% | 57.02% | 57.02% | 58.05%        | 63.14% |

Notes: This table compares prediction results of four models that were used to predict medical student dropout behaviors. Linear model corresponds to columns 3 and 6 in Table 2. The other three models use the same covariates. The  $\lambda$  values in the LASSO models are 0.0001132 and 0.0004163, respectively. The top 5 important predictors in the Random Forest model (column 8) are undermatched in college admission, attention to COVID, home access to internet, study phase, teachers/schoolmates on the frontline.

## Appendix: Survey

### Survey on Online Learning of Undergraduate Clinical Medical Students in China

*(Translated version for the items used in the paper)*

Note: The raw datasets and original survey (in Chinese) can be accessed through Data User Agreement with the National Center for Health Professions Education Development of China (medudata.bjmu.edu.cn).

#### Section 1

1. Your present location (select the province and prefecture-level city):

2. Your enrolled university/college (select the university name):

3. Your Gender:

A Male

B Female

4. Your grade:

A Grade 1

B Grade 2

C Grade 3

D Grade 4

E Grade 5

5. Your study phase:

A General education

B Basic medical education

C Clinical medical education

D Clerkship and rotation

6. Your enrolled program:

- A 5-year program
- B Rural 5-year program
- C 5+3-year program
- D 8-year program

7. Are you currently at home:

- A Yes
- B No, at the university
- C No, at another place

8. Your current residence location belongs to:

- A Rural area
- B Suburban area
- C Urban area

9. Do you have a doctor parent:

- A Yes, both parents are doctors
- B Yes, one parent is a doctor
- C No

10. How is your access to internet:

- A WIFI is in a good condition
- B WIFI is unstable
- C No WIFI, only mobile data are available
- D No WIFI, mobile data are unstable

11. Your current academic (GPA) ranking is:

A Top 25

B 25-50

C 50-75

D Bottom 25

12. Whether your college admission results are lower than expected:

A Yes

B No

13. Do you have teachers/schoolmates that you know well who have served at the frontline:

A Yes

B No

14. Please recall if you were planning to become a doctor after graduation before the COVID-19:

A I wanted to be a doctor

B I did not wanted to be a doctor

**[Sections on student learning experiences during COVID]**

## **Section 2**

1. How serious do you think this COVID-19 outbreak is:

A Very serious

B Serious

C Not serious

2. Have you paid attention to the epidemic:

A Yes, I have paid great attention to it.

B I paid attention to it.

C I didn't pay attention.

[Nudge information randomly presented to treated students]

3. Do you plan to become a doctor after graduation:

A Yes

B No
